# Supplementary material for: Application of Mild Therapeutic Hypothermia on Stroke: A Systematic Review and Meta-Analysis
Source: Hindawi journal article supplement (doi:10.1155/2012/295906), 2012-01-01
Supplement: f1 [file 295906.f1.pdf]

| <b>QUOROM Statement checklist</b>                                                                   |                             |                                                                                                                                                                                                                                                                                                                           |                 |                                                  |
|-----------------------------------------------------------------------------------------------------|-----------------------------|---------------------------------------------------------------------------------------------------------------------------------------------------------------------------------------------------------------------------------------------------------------------------------------------------------------------------|-----------------|--------------------------------------------------|
| <b>Application of mild therapeutic hypothermia on stroke: a systematic review and meta-analysis</b> |                             |                                                                                                                                                                                                                                                                                                                           |                 |                                                  |
| Heading                                                                                             | Subheading                  | Descriptor                                                                                                                                                                                                                                                                                                                | Reported? (Y/N) | Heading: Subheading                              |
| Title                                                                                               |                             | Identify the report as a systematic review                                                                                                                                                                                                                                                                                | Y               | Title                                            |
| Abstract                                                                                            |                             | Use a structured format                                                                                                                                                                                                                                                                                                   | Y               | Abstract                                         |
|                                                                                                     | Objectives                  | The clinical question explicitly                                                                                                                                                                                                                                                                                          | Y               | Abstract: Background                             |
|                                                                                                     | Data sources                | The databases (ie, list) and other information sources                                                                                                                                                                                                                                                                    | Y               | Abstract: Methods                                |
|                                                                                                     | Review methods              | The selection criteria (ie, population, intervention, outcome, and study design); methods for validity assessment, data abstraction, and study characteristics, and quantitative data synthesis in sufficient detail to permit replication                                                                                | Y               | Abstract: Methods                                |
|                                                                                                     | Results                     | Characteristics of the RCTs included and excluded; qualitative and quantitative findings (ie, point estimates and confidence intervals); and subgroup analyses                                                                                                                                                            | Y               | Abstract: Results                                |
|                                                                                                     | Conclusion                  | The main results                                                                                                                                                                                                                                                                                                          | Y               | Abstract: Conclusion                             |
|                                                                                                     |                             | <b>Describe</b>                                                                                                                                                                                                                                                                                                           |                 |                                                  |
| Introduction                                                                                        |                             | The explicit clinical problem, biological rationale for the intervention, and rationale for review                                                                                                                                                                                                                        | Y               | Background                                       |
| Methods                                                                                             | Searching                   | The information sources, in detail (eg, databases, registers, personal files, expert informants, agencies, hand-searching), and any restrictions (years considered, publication status, language of publication)                                                                                                          | Y               | Methods: Identification, Inclusion and Exclusion |
|                                                                                                     | Selection                   | The inclusion and exclusion criteria (defining population, intervention, principal outcomes, and study design)                                                                                                                                                                                                            | Y               | Methods: Identification, Inclusion and Exclusion |
|                                                                                                     | Validity assessment         | The criteria and process used (eg, masked conditions, quality assessment, and their findings)                                                                                                                                                                                                                             | Y               | Methods: Identification, Inclusion and Exclusion |
|                                                                                                     | Data abstraction            | The process or processes used (eg, completed independently, in duplicate)                                                                                                                                                                                                                                                 | Y               | Methods: Data abstraction                        |
|                                                                                                     | Study characteristics       | The type of study design, participants' characteristics, details of intervention, outcome definitions, and how clinical heterogeneity was assessed                                                                                                                                                                        | Y               | Methods: Clinical outcomes                       |
|                                                                                                     | Quantitative data synthesis | The principal measures of effect (eg, relative risk), method of combining results (statistical testing and confidence intervals), handling of missing data; how statistical heterogeneity was assessed; a rationale for any a-priori sensitivity and subgroup analyses; and any assessment of publication bias            | Y               | Methods: Statistical analysis                    |
| Results                                                                                             | Trial flow                  | Provide a meta-analysis profile summarising trial flow (see figure)                                                                                                                                                                                                                                                       | Y               | Results: Figure 1                                |
|                                                                                                     | Study characteristics       | Present descriptive data for each trial (eg, age, sample size, intervention, dose, duration, follow-up period)                                                                                                                                                                                                            | Y               | Results: Table 1-3                               |
|                                                                                                     | Quantative data synthesis   | Report agreement on the selection and validity assessment; present simple summary results (for each treatment group in each trial, for each primary outcome); present data needed to calculate effect sizes and confidence intervals in intention-to-treat analyses (eg 2X2 tables of counts, means and SDs, proportions) | Y               | Results: Figure 2-3                              |
| Discussion                                                                                          |                             | Summarise key findings; discuss clinical inferences based on internal and external validity; interpret the results in light of the totality of available evidence; describe potential biases in the review process (eg, publication bias); and suggest a future research agenda                                           | Y               | Discussion                                       |
